# Supplementary material
Source: PubMed Central journal article supplement (PMC2613725)
Supplement: pp.108.125005_1.pdf [file pp.108.125005_1.pdf]

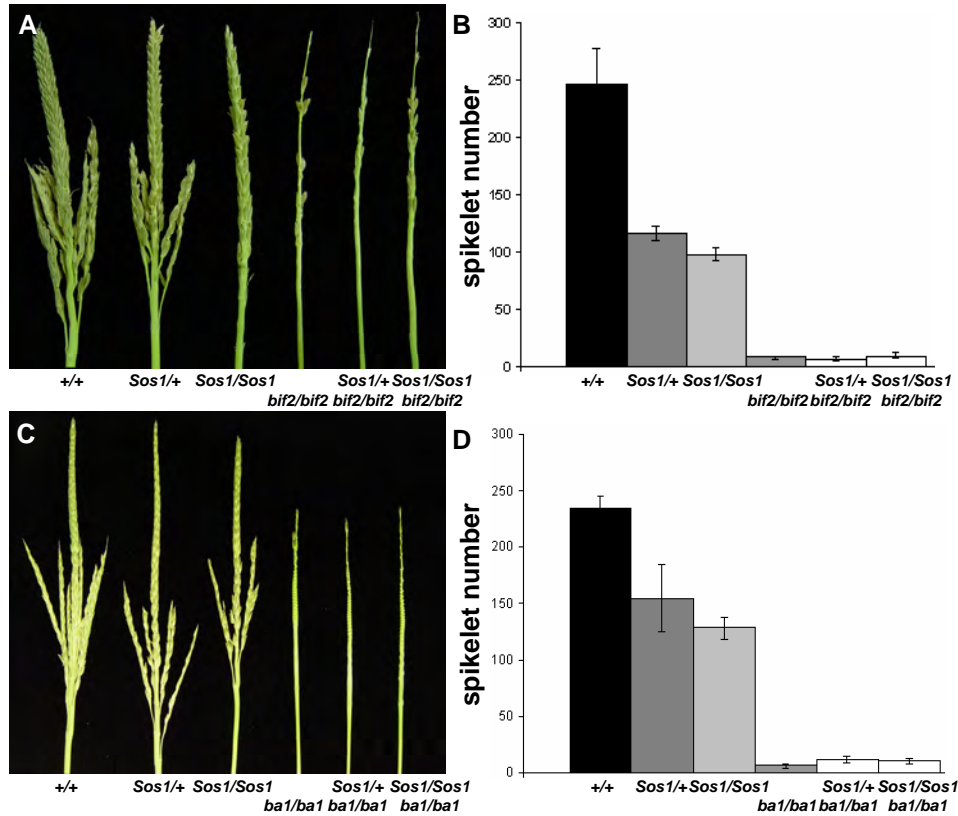

**Supplemental Figure S1. Genetic interaction of *Sos1* with *bif2* and *ba1***

(A) Photograph of the mature tassels of all genetic classes of an F2 family segregating for *Sos1* and *bif2*. (B) Quantification of spikelet number on the main spike of the tassel in *Sos1; bif2* double mutant family. (C) Photograph of the mature tassels of all genetic classes of an F2 family segregating for *Sos1* and *ba1*. (D) Quantification of spikelet number on the main spike of the tassel in *Sos1; ba1* double mutant family.
